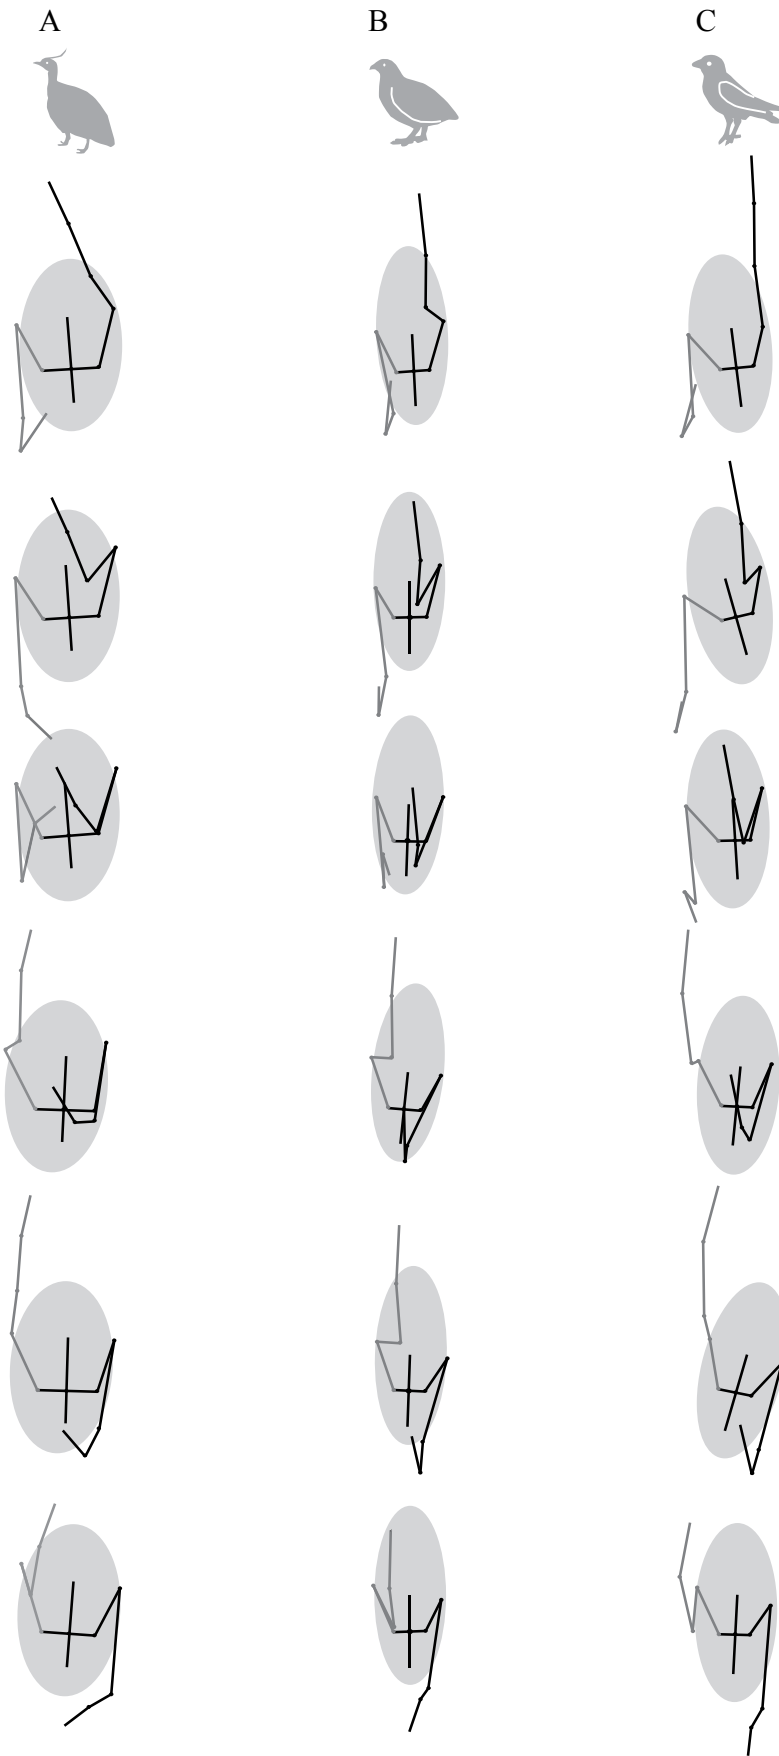

Fig. S1. Stick figures of the stance phase of the right limb (black) from ventro-dorsal perspective based on an X-ray videographic sequence (Fr=0.06). (A) *Eudromia elegans*, (B) *Coturnix coturnix* and (C) *Corvus monedula*.

Table S1. Kinematic parameters of limb joint angles and their relation to speed during swing

|                          |     | <i>N</i> | Angle (deg) | Range (deg) | <i>R</i> <sup>2</sup> | <i>b</i>    | <i>a</i>    |
|--------------------------|-----|----------|-------------|-------------|-----------------------|-------------|-------------|
| <i>Eudromia elegans</i>  |     |          |             |             |                       |             |             |
| Hip                      | Max | 94       | 65.4±8.5    | 44.2–86.8   | 0.73**                | 0.237±0.015 | 1.82±0.004  |
|                          | Min | 94       | 40.4±3      | 32.1–48.2   | 0.004                 | 0.01±0.015  | 1.6±0.004   |
| Knee                     | Max | 93       | 130.9±5.2   | 107.2–144   | 0.451**               | 0.057±0.007 | 2.12±0.002  |
|                          | Min | 93       | 50.4±3.1    | 43.2–55.7   | 0.007                 | −0.01±0.012 | 1.7±0.003   |
| Intertarsal              | Max | 91       | 141.4±5.7   | 124.7–157   | 0.448**               | 0.053±0.006 | 2.15±0.001  |
|                          | Min | 91       | 66.3±7.8    | 48.5–81.6   | 0.322**               | 0.137±0.021 | 1.83±0.005  |
| TMTP joint               | Max | 93       | 244.4±7.3   | 224–263     | 0.015                 | 0.007±0.006 | 2.39±0.001  |
|                          | Min | 92       | 156.5±12.8  | 126–203     | 0.001                 | −0.01±0.016 | 2.2±0.004   |
| <i>Coturnix coturnix</i> |     |          |             |             |                       |             |             |
| Hip                      | Max | 84       | 66.8±5.6    | 52.4–83.8   | 0.2**                 | 0.103±0.023 | 1.847±0.007 |
|                          | Min | 84       | 40.8±3.4    | 30.4–53     | 0.143**               | −0.1±0.027  | 1.59±0.008  |
| Knee                     | Max | 84       | 131.3±6.3   | 111.1–148   | 0.089**               | 0.04±0.014  | 2.13±0.004  |
|                          | Min | 84       | 48.9±3.7    | 33.3–63     | 0.004                 | −0.02±0.036 | 1.68±0.011  |
| Intertarsal              | Max | 80       | 127.6±9     | 83.2–152.8  | 0.034*                | 0.041±0.024 | 2.11±0.008  |
|                          | Min | 80       | 51.6±5.1    | 32.3–70.5   | 0.006                 | −0.03±0.039 | 1.7±0.012   |
| TMTP joint               | Max | 73       | 258.7±11.3  | 227.5–283   | 0.159**               | 0.05±0.014  | 2.42±0.004  |
|                          | Min | 73       | 157.2±6.4   | 133.6–172   | 0.1**                 | −0.03±0.011 | 2.19±0.003  |
| <i>Corvus monedula</i>   |     |          |             |             |                       |             |             |
| Hip                      | Max | 80       | 73±8.8      | 57.8–93.6   | 0.481**               | 0.208±0.025 | 1.92±0.008  |
|                          | Min | 80       | 47.3±4.2    | 34.5–56.3   | 0.004                 | −0.02±0.029 | 1.67±0.01   |
| Knee                     | Max | 81       | 137.5±7.4   | 111–155     | 0.619**               | 0.119±0.01  | 2.17±0.003  |
|                          | Min | 81       | 46.9±4.7    | 38.5–67.8   | 0.068*                | 0.064±0.027 | 1.69±0.009  |
| Intertarsal              | Max | 75       | 145.5±7.2   | 122.4–158   | 0.379**               | 0.084±0.013 | 2.19±0.004  |
|                          | Min | 75       | 70.1±3.5    | 60.2–77.6   | 0.134**               | −0.05±0.014 | 1.83±0.005  |
| TMTP joint               | Max | 70       | 222.5±12.9  | 192–250.7   | 0.607**               | 0.113±0.011 | 2.38±0.004  |
|                          | Min | 71       | 151.3±8.1   | 110.7187    | 0.013                 | 0.018±0.019 | 2.18±0.007  |

*N*, number of trials; TMTP, tarsometatarso-phalangeal. Angle is given as mean ± s.d.

Regression equation:  $\ln y = \ln b x + a$ , where *x* is speed; coefficients are presented ± s.e.

\**P*<0.05; \*\**P*<0.01.

Table S2. Spatio-temporal gait parameters and protraction and retraction angles of the species

| Parameter                | <i>N</i> | Mean (±s.d.) | Range     | <i>R</i> <sup>2</sup> | <i>b</i>     | <i>a</i>     |
|--------------------------|----------|--------------|-----------|-----------------------|--------------|--------------|
| <i>Eudromia elegans</i>  |          |              |           |                       |              |              |
| Stride duration (s)      | 101      | 0.36±0.12    | 0.22–0.75 | 0.968**               | −0.527±0.01  | −0.489±0.003 |
| Stance duration (s)      | 97       | 0.24±0.11    | 0.10–0.56 | 0.981**               | −0.763±0.011 | −0.723±0.003 |
| Swing duration (s)       | 97       | 0.13±0.02    | 0.10–0.2  | 0.362**               | −0.127±0.017 | −0.911±0.005 |
| Frequency (Hz)           | 101      | 3±0.87       | 1.3–4.6   | 0.969**               | 0.527±0.01   | 0.498±0.003  |
| Duty factor (%)          | 97       | 63±9         | 45–80     | 0.882**               | −0.233±0.009 | 1.776±0.002  |
| Stride length (m)        | 101      | 0.3±0.08     | 0.16–0.51 | 0.96**                | 0.471±0.01   | −0.498±0.003 |
| Step length (m)          | 97       | 0.18±0.03    | 0.12–0.22 | 0.833**               | 0.237±0.011  | −0.723±0.003 |
| Swing length (m)         | 97       | 0.12±0.06    | 0.04–0.26 | 0.964**               | 0.873±0.017  | −0.911±0.005 |
| Protraction angle (deg)  | 86       | 47.8±1.9     | 43.6–51.8 | 0.015                 | −0.01±0.009  | 1.68±0.002   |
| Retraction angle (deg)   | 90       | 25.6±5.3     | 8.2–35.5  | 0.773                 | 0.479±0.028  | 1.41±0.006   |
| <i>Coturnix coturnix</i> |          |              |           |                       |              |              |
| Stride duration (s)      | 89       | 0.4±0.1      | 0.29–0.89 | 0.850**               | −0.519±0.023 | −0.519±0.006 |
| Stance duration (s)      | 89       | 0.29±0.09    | 0.16–0.75 | 0.874**               | −0.707±0.029 | −0.712±0.008 |
| Swing duration (s)       | 89       | 0.11±0.01    | 0.08–0.15 | 0.019                 | −0.049±0.037 | −0.959±0.01  |
| Frequency (Hz)           | 89       | 2.63±0.47    | 1.1–3.5   | 0.849**               | 0.521±0.023  | 0.519±0.006  |
| Duty factor (%)          | 89       | 70±5         | 56.4–83.8 | 0.632**               | −0.188±0.015 | 1.807±0.004  |
| Stride length (m)        | 89       | 0.24±0.04    | 0.14–0.34 | 0.836**               | 0.477±0.022  | −0.519±0.006 |
| Step length (m)          | 89       | 0.18±0.02    | 0.10–0.23 | 0.543**               | 0.293±0.029  | −0.712±0.008 |
| Swing length (m)         | 89       | 0.08±0.02    | 0.03–0.14 | 0.88**                | 0.949±0.037  | −0.958±0.01  |
| Protraction angle (deg)  | 95       | 49.7±2.2     | 43.6–56.3 | 0.219                 | 0.058±0.011  | 1.71±0.004   |
| Retraction angle (deg)   | 86       | 25.7±7.6     | 3.8–39.1  | 0.644                 | 0.868±0.07   | 1.57±0.021   |
| <i>Corvus monedula</i>   |          |              |           |                       |              |              |
| Stride duration (s)      | 93       | 0.45±0.08    | 0.24–0.7  | 0.809**               | −0.494±0.025 | −0.483±0.008 |
| Stance duration (s)      | 93       | 0.32±0.08    | 0.14–0.6  | 0.852**               | −0.717±0.031 | −0.701±0.010 |
| Swing duration (s)       | 93       | 0.13±0.02    | 0.09–0.18 | 0.012                 | 0.041±0.039  | −0.872±0.012 |
| Frequency (Hz)           | 93       | 2.32±0.45    | 1.4–4.2   | 0.81**                | 0.495±0.025  | 0.484±0.008  |
| Duty factor (%)          | 93       | 70±6.5       | 56–87     | 0.73**                | −0.227±0.015 | 1.782±0.004  |
| Stride length (m)        | 93       | 0.25±0.05    | 0.12–0.34 | 0.817**               | 0.507±0.025  | −0.483±0.008 |
| Step length (m)          | 93       | 0.17±0.02    | 0.10–0.23 | 0.458**               | 0.28±0.032   | −0.702±0.01  |
| Swing length (m)         | 93       | 0.08±0.03    | 0.02–0.14 | 0.887**               | 1.04±0.039   | −0.872±0.012 |
| Protraction angle (deg)  | 64       | 49 ±2.2      | 41.8–52   | 0.308                 | 0.064±0.012  | 1.7±0.004    |
| Retraction angle (deg)   | 51       | 22.9±9.2     | −2.4–38.3 | 0.653                 | 1.43±0.149   | 1.7±0.049    |

*N*, number of trials.

Regression equation:  $\ln y = \ln b x + a$ , where *x* is speed; coefficients are presented ± s.e.

\**P*<0.05; \*\**P*<0.01.
